# Supplementary material for: Genome Analysis of Haplotype D of Candidatus Liberibacter Solanacearum
Source: PubMed Central journal article supplement (PMC6295461; doi:10.3389/fmicb.2018.02933), 2018-12-10
Supplement: Presentation_1.pdf [file Presentation_1.pdf]

Supplementary Table S1. Summary of extraction, amplification, and sequencing.

| Sample            | gDNAac          | gDNAa          | gDNActab         |
|-------------------|-----------------|----------------|------------------|
| Source            | 6 Nymph         | 6 Nymph        | 4 Adult Psylid   |
| Extraction method | g-DNA           | g-DNA          | cTAB             |
| Amplification     | Q-REPLI-g Mini* | Q-REPLI-g Mini | No Amplification |
| DNA ng/ $\mu$ l** | 16.9            | 408            | 155              |
| Total reads       | 11,482,272      | 9,665,080      | 9,121,560        |
| # of LsoD reads   | 96,907          | 71,906         | 289,941          |
| overall alignment | 0.84%           | 0.74%          | 3.18%            |

\*amplification was followed by cleanup with QIAamp DNA Mini Kit \*\*final concentration

Supplementary Table S2. Dubious annotation list of *Candidatus Liberibacter solanacearum* haplotype D.

| <b>Locus Tag</b>      | <b>Dubious annotation</b>                                      |
|-----------------------|----------------------------------------------------------------|
| <b>Ga0157477_1041</b> | C (+Ga0157477_1201[-119]+Ga0157477_1041[-185]-Ga0157477_1121)  |
| <b>Ga0157477_1131</b> | C (+Ga0157477_1231[-239]-Ga0157477_1131[-155]-Ga0157477_1191)  |
| <b>Ga0157477_1201</b> | A (+Ga0157477_1031[-368]+Ga0157477_1201[-119]+Ga0157477_1041)  |
| <b>Ga0157477_1211</b> | C (+Ga0157477_1081[-173]+Ga0157477_1211[-107]-Ga0157477_1051)  |
| <b>Ga0157477_1311</b> | A (-Ga0157477_1051[-317]-Ga0157477_1311[-251]-Ga0157477_1181)  |
| <b>Ga0157477_1321</b> | D (-Ga0157477_1191[-1544]+Ga0157477_1321[-184]+Ga0157477_1221) |
| <b>Ga0157477_1471</b> | D (-Ga0157477_1261[-155]+Ga0157477_1471[-107]+Ga0157477_1341)  |

Supplementary Table S3. Sequences in LsoD with homology to LsoA Prophage P1 identified by BLASTN.

| Contig # | % Identity to LsoA<br>Prophage P1 | Size (Kb) | Position    |
|----------|-----------------------------------|-----------|-------------|
| 3        | 84                                | ~ 0.2     | 1-179       |
| 1        | 84                                | ~ 2.7     | 941-3659    |
| 23       | 98                                | ~ 6.6     | 11299-17899 |
| 17       | 99                                | ~ 3.4     | 25044-28450 |
| 36       | 84                                | ~ 6.7     | 1700-8447   |
| 37       | 80                                | ~ 1.4     | 1732-3143   |
| 4        | 76                                | ~ 1.8     | 1627-3394   |
| 38       | 86                                | ~ 1.4     | 692-2086    |
| 34       | 80                                | ~ 0.6     | 2236-2825   |
| 21       | 82                                | ~ 0.3     | 2531-2790   |

Supplementary Table S4. Percent average nucleotide identity analysis among Lso haplotypes.

|                          | <b>LsoA<br/>(NZ1)</b> | <b>LsoB<br/>(ZC1)</b> | <b>LsoC<br/>(FIN114)</b> | <b>LsoD<br/>(ISR100)</b> |
|--------------------------|-----------------------|-----------------------|--------------------------|--------------------------|
| <b>LsoA<br/>(NZ1)</b>    | 100                   | X                     | X                        | X                        |
| <b>LsoB<br/>(ZC1)</b>    | 97.52                 | 100                   | X                        | X                        |
| <b>LsoC<br/>(FIN114)</b> | 97.18                 | 97.27                 | 100                      | X                        |
| <b>LsoD<br/>(ISR100)</b> | 97.85                 | 97.35                 | 97.86                    | 100                      |

Supplemental Table S5. List of genes unique to *Candidatus Liberibacter solanacearum* haplotype D.

| #  | Gene ID         | Length (Amino Acids) | Description                      |
|----|-----------------|----------------------|----------------------------------|
| 1  | Ga0157477_10665 | 62                   | hypothetical protein             |
| 2  | Ga0157477_10826 | 48                   | putative ISL3 family transposase |
| 3  | Ga0157477_1112  | 93                   | putative protease                |
| 4  | Ga0157477_1114  | 51                   | hypothetical protein             |
| 5  | Ga0157477_11610 | 44                   | hypothetical protein             |
| 6  | Ga0157477_11611 | 121                  | hypothetical protein             |
| 7  | Ga0157477_11613 | 62                   | restriction endonuclease         |
| 8  | Ga0157477_1167  | 45                   | hypothetical protein             |
| 9  | Ga0157477_1169  | 110                  | hypothetical protein             |
| 10 | Ga0157477_1184  | 92                   | hypothetical protein             |
| 11 | Ga0157477_1185  | 102                  | hypothetical protein             |
| 12 | Ga0157477_1201  | 40                   | hypothetical protein             |
| 13 | Ga0157477_1202  | 95                   | hypothetical protein             |
| 14 | Ga0157477_1211  | 36                   | hypothetical protein             |
| 15 | Ga0157477_1244  | 108                  | hypothetical protein             |
| 16 | Ga0157477_1285  | 120                  | restriction endonuclease         |
| 17 | Ga0157477_1286  | 48                   | transposase                      |
| 18 | Ga0157477_13139 | 99                   | hypothetical protein             |
| 19 | Ga0157477_13140 | 65                   | hypothetical protein             |
| 20 | Ga0157477_13148 | 134                  | hypothetical protein             |
| 21 | Ga0157477_1323  | 183                  | hypothetical protein             |
| 22 | Ga0157477_13442 | 30                   | hypothetical protein             |
| 23 | Ga0157477_13712 | 38                   | hypothetical protein             |
| 24 | Ga0157477_13716 | 39                   | hypothetical protein*            |
| 25 | Ga0157477_13717 | 60                   | hypothetical protein             |
| 26 | Ga0157477_1384  | 71                   | hypothetical protein             |
| 27 | Ga0157477_13843 | 75                   | hypothetical protein             |
| 28 | Ga0157477_13918 | 76                   | hypothetical protein             |
| 29 | Ga0157477_13929 | 133                  | hypothetical protein             |
| 30 | Ga0157477_1401  | 50                   | hypothetical protein             |
| 31 | Ga0157477_14614 | 38                   | hypothetical protein             |
| 32 | Ga0157477_1471  | 36                   | hypothetical protein             |
| 33 | Ga0157477_1187  | 112                  | hypothetical protein*            |

\* putative secreted protein
